# Supplementary material
Source: Elsevier journal article supplement (https://www.sciencedirect.com/science/article/pii/S253001641730263X)
Supplement: mmc1 [file S253001641730263X:mmc1.xlsx]

## Sheet: Hoja1
Anexo 1
Características que debe cumplir una enfermedad para que el análisis molecular pueda ser utilizado no solo como herramienta de confirmación diagnóstica, sino también para descartar la enfermedad.		Observaciones
1	Enfermedad monogénica con alta correlación genotipo/fenotipo probada en series amplias de pacientes.	Solo en este caso el análisis de un solo gen puede ser informativo. Podrían analizarse varios genes si la enfermedad puede ser causada por uno u otro gen (base molecular heterogénea) aunque siempre predefinidos y causantes cada uno de ellos de forma aislada.
2	Base molecular bien conocida: Alteraciones validadas clínicamente con amplio poder de caracterización.	En el caso de entidades recesivas, una cobertura del 80% garantizaría la caracterización de, al menos, un alelo en el 96% (solo en 4% de casos afectos no se caracterizaría ningun alelo). Siempre que no existiera consanguinidad. Debe incluirse una técnica que detecte los homozigotos para variantes raras (ver #11).
3	Disponibilidad de un abordaje molecular rápido y coste-efectivo que detecte estas alteraciones sin introducir incertidumbre.	Análisis dirigido a las alteraciones validadas clínicamente en series de pacientes de distintas poblaciones ("mutaciones frecuentes") con cobertura >80%.
De forma especifica para CYP21A2 debe garantizarse:		Observaciones (ver Anexo 2)
4	Experiencia en el análisis e interpretación de los resultados del análisis de CYP21A2 ya que se trata de un locus complejo (pseudogén duplicado en tandem)	Los alelos mutados e incluso los normales pueden ser complejos. Un análisis incompleto o inexperto puede dar lugar a falsos positivos y negativos18-20 (ver #6 a 9)
5	Discriminar alteraciones severas y leves, éstas últimas muy frecuentes.	Solo las alteraciones graves (en ambos alelos) dan lugar a la forma clásica HSC.
6	Detectar no solo las alteraciones puntuales sino también las deleciones, conversiones y duplicaciones génicas (funcional).	La detección de deleciones requiere el análisis de dosis génica (importante controlar calidad y cantidad de DNA para técnica de MLPA)
7	Detectar >80% de los alelos causantes de todas formas clásicas o neonatales, no solo pierde sal, también virilizantes simples (ver Anexo 2)	En nuestra población, incluir la alteración c.1280G>A (p.Arg427His) en el estudio básico18 Ver también los estudios complementarios en #9.
8	Detectar también alteraciones intrónicas	La mutación puntual más frecuentes es intrónica c.293-13C>G1. Una variante intrónica modifica la severidad de los frecuentes alelos leves p.Val282Leu19.
9	Estudio complementario de las alteraciones puntuales cuyas variantes pueden dar lugar a alelos de mayor o menor severidad (ver Anexo 2)	p.Pro31Leu o p.Val282Leu pueden ser alelos severos si incluyen alteración adicional19, p.Gln319X en alelos con duplicación génica no es un alelo deficiente20.
10	En caso de aplicar la secuenciación del gen como técnica de análisis primario, garantizar una correcta discriminación de polimorfismos, no solo los frecuentes también variantes polimórficas raras.	Gen muy polimórfico, no está todavía disponible la interpretación/ validación clínica de todas ellas. Algunas variantes publicadas como causales han sido consideradas polimorfismos a posteriori.
11	Detectar si podría existir homozigosis por consanguinidad, en ese caso no solo analizar alteraciones frecuentes, secuenciar.	Necesario para cualquier entidad recesiva en que se utiliza genotipado como 2º nivel. Los polimorfismos tipo microsatélite de la región HLA son muy informativos21.
12	Si se han detectado dos mutaciones, segregar en progenitores.	Si las alteraciones detectadas segregan en el mismo alelo pero se mantiene la sospecha clínica de forma clásica HSC pasar a secuenciar el gen.
13	Si solo se ha detectado un alelo, pero es de tipo grave, hacer secuenciación CYP21A2 en caso de que se mantenga la 17OHP elevada y/o haya clínica HSC.	La positividad para un solo alelo puede corresponder con una situación de portador22
14	Si el estudio CYP21A2 ha resultado negativo pero hay clínica grave HSC analizar otros genes: CYP11B1, 3βHSDH, POR.	Útil disponer de las determinaciones de los metabolitos marcadores de otros déficits
