# Supplementary material
Source: Elsevier journal article supplement (https://www.sciencedirect.com/science/article/pii/S253001641730263X)
Supplement: mmc2 [file S253001641730263X:mmc2.docx]

|  | Anexo 2. Protocolo de genotipado completo *CYP21A2*. Se especifica el cribado básico de las alteraciones frecuentes que ayuda a descartar la enfermedad postcribado neonatal positivo, con el análisis complementario requerido para la correcta discriminación de graves y leves. | | | | | | | | | | | |
| --- | --- | --- | --- | --- | --- | --- | --- | --- | --- | --- | --- | --- |
|  |  |  |  |  |  |  |  |  |  |  |  |  |
|  |  | **Cribado básico *CYP21A2*** | | **Negativo alteraciones frecuentesa** |  | **Positivo alteración/es LEVE/S** |  |  | **Positivo una o varias alteraciones GRAVE/S** |  |  |  |
|  |  |  |  | **solo puntuales* 85%** |  |  |  |  |  |  |  |  |
|  |  |  |  | (*incluyendo c.332-339del e híbridos delec/conv con punto ruptura entre ex3 y ex611) |  |  |  |  |  |  |  |  |
|  |  |  |  | **con MLPA 95%** |  |  |  |  |  |  |  |  |
|  |  |  |  |  |  |  |  |  |  |  |  |  |
|  |  |  | Imprescindibles para completar estudios NEGATIVOS Y POSITIVOS para algunas LEVES y GRAVE | **descartar consanguinidad** |  | **Análisis complementario:** |  |  | **Análisis complementario:** |  |  |  |
|  |  | Microsatélites21 HETEROZIGOTO |  |  |  |  | Gln318X en alelo Dup Gen es VARIANTE NORMAL20 | Descartab HSC21OHD |  |  |
|  |  |  |  | p.Pro31Leu ¿tiene Conversión 5´? |  |  | **[Conv Prom 5´; p.Pro31Leu] es GRAVE** |  |  |  |
|  |  |  |  | p.Val282Leu ¿presenta c.292+5G>A? |  |  | **[c.292+5G>A;p.Val282Leu] es GRAVE19** |  |  |  |
|  |  | **Estudios complementarios** |  | NEGATIVO Descartab HSC |  | NEGATIVO Descartab HSC clásica |  |  | POSITIVO **Confirma HSC si:** |  |  |  |
|  |  |  | Para completar genotipado y/o asesoramiento |  |  | SEGREGAR EN PROGENITORES | | | |  |  |  |
|  |  |  |  | LEVE/LEVE ó LEVE/ GRAVE | |  | DOS ALELOS GRAVES | DOS ALELOS GRAVES | HSC CLÁSICA **(pierde sal o virilizante simplee)** |  |
|  |  |  |  | **HSC NO CLÁSICAc** |  |  | UN ALELO GRAVE CYP21A2 +SecuenciacióndCYP21A2 positiva (alteración grave) |  |
|  |  |  |  |  |  |  |  |  | Secuenciaciónd CYP21A2 NEGATIVA o variante/s no patogénica | UN ALELO GRAVE**f** PORTADOR22 (Asesoramiento) | HSC21OHD NEGATIVO |  |
|  |  |  | | | | | |  | Si **NEGATIVO** pero hay clínica grave: Secuenciar **otros gene**s, Determinar otros esteroides marcadores | DOS ALELOS GRAVES *CYP11B1 o 3HSDH o POR* | HSC CLÁSICA (otros déficits) |  |
|  |  |  | | | | | | | | | |  |
|  |  | a Alteraciones puntuales frecuentes *CYP21A2* a descartar en nuestra población: p.Pro31Leu, **c.293-13C>G**, **c.332-339del**, **p.Ile173Asn**, **p.[Ile237Asn; Val238Glu; Met240Lys]**, p.Val282Leu, **c.923dupT, p.Gln319Stop y p.Arg357Trp, p.Arg427His,** p.Pro454Ser 10,11,18 (en negrita alteraciones graves o severas). La nomenclatura empleada se refiere a la RefSeq NM_000500.5. b El término "descarta" se refiere a que reduce probabilidad por debajo del 5% (ver texto). c La forma no clásica es leve y no es objeto del cribado su detección neonatal aunque en ocasiones pueden ser detectadas en el cribado. No requiere intervención clínica y solo se plantearía un seguimiento y, en caso de alteración grave en un alelo, el asesoramiento genético familiar. d Imprescindible discriminar polimorfismos y variantes raras sin evidencia clínica de implicación patológica.e En varones si uno de los alelo es p.Ile173Asn o p. Arg427His18 y en algunos homozigotos para la mutacón puntual más frecuente c.293-13C>G11 puede tratarse de una HSC virilizante clásica (que, en varones, será "críptica" en periodo neonatal). f Si solo se detecta un alelo grave se tratará de un portador, no afecto de la forma clásica de la deficiencia22. | | | | | | | | | |  |
